# Supplementary material for: Molecular Epidemiology and Phylogenetic Analyses of Influenza B Virus in Thailand during 2010 to 2014
Source: PLoS One. 2015 Jan 20;10(1):e0116302. doi: 10.1371/journal.pone.0116302 (PMC4300180; doi:10.1371/journal.pone.0116302)
Supplement: S1 Fig — (PDF) [file pone.0116302.s001.pdf]

# HA protein alignment for B/Victoria lineage strains in Thailand, 2010 - 2014

Reference strains, Vaccine strains, Thailand strains; Potential N-linked glycosylation sites; Receptor binding site

|                          | HA1 | 10 | 20 | 30 | 40 | 50 | 60 | 70 | 80 | 90 | 100 |
|--------------------------|-----|----|----|----|----|----|----|----|----|----|-----|
| B/Malaysia/2506/2004     | DR  | I  | C  | T  | G  | I  | T  | S  | S  | N  | S   |
| B/Thailand/CU-243/2006   | DR  | I  | C  | T  | G  | I  | T  | S  | S  | N  | S   |
| B/Thailand/CU-364/2008   | DR  | I  | C  | T  | G  | I  | T  | S  | S  | N  | S   |
| B/Singapore/19/2009      | DR  | I  | C  | T  | G  | I  | T  | S  | S  | N  | S   |
| B/Thailand/CU-B2390/2010 | DR  | I  | C  | T  | G  | I  | T  | S  | S  | N  | S   |
| B/Thailand/CU-B4585/2011 | DR  | I  | C  | T  | G  | I  | T  | S  | S  | N  | S   |
| B/Brisbane/60/2008       | DR  | I  | C  | T  | G  | I  | T  | S  | S  | N  | S   |
| B/Johannesburg/3964/2012 | DR  | I  | C  | T  | G  | I  | T  | S  | S  | N  | S   |
| B/Thailand/CU-B2271/2010 | DR  | I  | C  | T  | G  | I  | T  | S  | S  | N  | S   |
| B/Thailand/CU-B2660/2010 | DR  | I  | C  | T  | G  | I  | T  | S  | S  | N  | S   |
| B/Thailand/CU-B2504/2010 | DR  | I  | C  | T  | G  | I  | T  | S  | S  | N  | S   |
| B/Thailand/CU-B3153/2010 | DR  | I  | C  | T  | G  | I  | T  | S  | S  | N  | S   |
| B/Thailand/CU-B4504/2011 | DR  | I  | C  | T  | G  | I  | T  | S  | S  | N  | S   |
| B/Thailand/CU-B5522/2011 | DR  | I  | C  | T  | G  | I  | T  | S  | S  | N  | S   |
| B/Thailand/CU-C1262/2010 | DR  | I  | C  | T  | G  | I  | T  | S  | S  | N  | S   |
| B/Thailand/CU-C1451/2010 | DR  | I  | C  | T  | G  | I  | T  | S  | S  | N  | S   |
| B/Thailand/CU-C1768/2011 | DR  | I  | C  | T  | G  | I  | T  | S  | S  | N  | S   |
| B/Thailand/CU-H3002/2011 | DR  | I  | C  | T  | G  | I  | T  | S  | S  | N  | S   |
| B/Thailand/CU-H3052/2011 | DR  | I  | C  | T  | G  | I  | T  | S  | S  | N  | S   |
| B/Thailand/CU-B6148/2012 | DR  | I  | C  | T  | G  | I  | T  | S  | S  | N  | S   |
| B/Thailand/CU-B6257/2012 | DR  | I  | C  | T  | G  | I  | T  | S  | S  | N  | S   |
| B/Thailand/CU-B6975/2012 | DR  | I  | C  | T  | G  | I  | T  | S  | S  | N  | S   |
| B/Thailand/CU-B7215/2012 | DR  | I  | C  | T  | G  | I  | T  | S  | S  | N  | S   |
| B/Thailand/CU-B7337/2012 | DR  | I  | C  | T  | G  | I  | T  | S  | S  | N  | S   |
| B/Thailand/CU-B5734/2011 | DR  | I  | C  | T  | G  | I  | T  | S  | S  | N  | S   |
| B/Odessa/3886/2010       | DR  | I  | C  | T  | G  | I  | T  | S  | S  | N  | S   |
| B/Thailand/CU-B2201/2010 | DR  | I  | C  | T  | G  | I  | T  | S  | S  | N  | S   |
| B/Thailand/CU-B2320/2010 | DR  | I  | C  | T  | G  | I  | T  | S  | S  | N  | S   |
| B/Thailand/CU-B2372/2010 | DR  | I  | C  | T  | G  | I  | T  | S  | S  | N  | S   |
| B/Thailand/CU-B2432/2010 | DR  | I  | C  | T  | G  | I  | T  | S  | S  | N  | S   |
| B/Thailand/CU-B5671/2011 | DR  | I  | C  | T  | G  | I  | T  | S  | S  | N  | S   |
| B/Thailand/CU-H2738/2010 | DR  | I  | C  | T  | G  | I  | T  | S  | S  | N  | S   |
| B/Thailand/CU-B5910/2011 | DR  | I  | C  | T  | G  | I  | T  | S  | S  | N  | S   |
| B/Thailand/CU-B6240/2012 | DR  | I  | C  | T  | G  | I  | T  | S  | S  | N  | S   |
| B/Thailand/CU-H1400/2010 | DR  | I  | C  | T  | G  | I  | T  | S  | S  | N  | S   |
| B/Thailand/CU-H1896/2010 | DR  | I  | C  | T  | G  | I  | T  | S  | S  | N  | S   |
| B/Thailand/CU-H2132/2010 | DR  | I  | C  | T  | G  | I  | T  | S  | S  | N  | S   |
| B/Thailand/CU-H2584/2010 | DR  | I  | C  | T  | G  | I  | T  | S  | S  | N  | S   |

|                          | 110                                          | 120 | 130        | 140 | 150   | 160 | 170                          | 180 | 190 | 200  |
|--------------------------|----------------------------------------------|-----|------------|-----|-------|-----|------------------------------|-----|-----|------|
| B/Malaysia/2506/2004     | RTKIRQLPNLLRGYEHRLSTHNVINAEANAPGGSYKIGTSGSCP | NVT | NGNGFFATMA | MAV | PKNDN | NKT | ATNSLTIEVPYICTEGEDQITVWGFHSD | NEA | Q   |      |
| B/Thailand/CU-243/2006   |                                              |     |            |     |       |     |                              |     |     | T.   |
| B/Thailand/CU-364/2008   |                                              |     |            |     |       |     |                              |     |     | T.   |
| B/Singapore/19/2009      |                                              |     |            |     |       |     |                              |     |     | T.   |
| B/Thailand/CU-B2390/2010 |                                              |     |            |     |       |     | A.                           |     |     | T.   |
| B/Thailand/CU-B4585/2011 |                                              |     |            |     |       | K.  | P.                           |     |     | T.   |
| B/Brisbane/60/2008       |                                              |     |            | I   |       | K.  | P.                           |     |     | D.T. |
| B/Johannesburg/3964/2012 |                                              |     |            |     |       | K.  | P.                           |     |     | T.   |
| B/Thailand/CU-B2271/2010 |                                              |     |            | I   |       | K.  | P.                           |     |     | T.   |
| B/Thailand/CU-B2660/2010 |                                              |     |            | I   |       | K.  | P.                           |     |     | T.   |
| B/Thailand/CU-B2504/2010 |                                              |     |            |     |       | K.  | P.                           |     |     | T.   |
| B/Thailand/CU-B3153/2010 |                                              |     |            |     |       | K.  | P.                           |     |     | T.   |
| B/Thailand/CU-B4504/2011 |                                              |     |            |     |       | K.  | P.                           |     |     | T.   |
| B/Thailand/CU-B5522/2011 |                                              |     |            |     | E.    | K.  | P.                           |     |     | T.   |
| B/Thailand/CU-C1262/2010 |                                              |     |            |     |       | K.  | P.                           |     |     | T.   |
| B/Thailand/CU-C1451/2010 |                                              |     |            |     |       | K.  | P.                           |     |     | T.   |
| B/Thailand/CU-C1768/2011 |                                              |     |            |     |       | K.  | P.                           |     |     | T.   |
| B/Thailand/CU-H3002/2011 |                                              |     |            |     | E.    | K.  | P.                           |     | I.  | T.   |
| B/Thailand/CU-H3052/2011 |                                              | K.  |            |     | E.    | K.  | P.                           |     |     | T.   |
| B/Thailand/CU-B6148/2012 |                                              |     |            |     | E.    | K.  | P.                           |     |     | T.   |
| B/Thailand/CU-B6257/2012 |                                              |     |            |     |       | K.  | P.                           |     |     | T.   |
| B/Thailand/CU-B6975/2012 |                                              |     |            |     | T.    | K.  | P.                           |     |     | T.   |
| B/Thailand/CU-B7215/2012 |                                              |     |            |     | E.    | K.  | P.                           |     |     | T.   |
| B/Thailand/CU-B7337/2012 |                                              |     |            |     | T.    | K.  | P.                           |     |     | T.   |
| B/Thailand/CU-B5734/2011 |                                              |     |            |     | E.    | K.  | P.                           |     |     | T.   |
| B/Odessa/3886/2010       |                                              |     |            |     |       | K.  | P.                           |     |     | T.   |
| B/Thailand/CU-B2201/2010 |                                              |     |            |     |       | K.  | P.                           |     |     | T.   |
| B/Thailand/CU-B2320/2010 |                                              |     |            |     |       | K.  | P.                           |     |     | T.   |
| B/Thailand/CU-B2372/2010 |                                              |     |            |     |       | K.  | P.                           |     |     | T.   |
| B/Thailand/CU-B2432/2010 |                                              |     |            |     |       | K.  | P.                           |     |     | T.   |
| B/Thailand/CU-B5671/2011 |                                              |     |            |     |       | K.  | P.                           |     |     | T.   |
| B/Thailand/CU-H2738/2010 |                                              |     |            |     |       | K.  | P.                           |     |     | T.   |
| B/Thailand/CU-B5910/2011 |                                              |     |            |     |       | K.  | P.                           |     |     | T.   |
| B/Thailand/CU-B6240/2012 |                                              | N.  |            | S.  |       | K.  | DP.                          |     |     | T.   |
| B/Thailand/CU-H1400/2010 |                                              |     |            |     |       | K.  | P.                           |     |     | T.   |
| B/Thailand/CU-H1896/2010 |                                              |     |            |     |       | K.  | P.                           |     |     | T.   |
| B/Thailand/CU-H2132/2010 |                                              |     |            |     |       | K.  | P.                           |     |     | T.   |
| B/Thailand/CU-H2584/2010 |                                              |     |            |     | E.    | K.  | P.                           |     |     | T.   |



[illegible][illegible]

# HA protein alignment for B/Yamagata lineage strains in Thailand, 2010 - 2014

Reference strains, Vaccine strains, Thailand strains; Potential N-linked glycosylation sites; Receptor binding site

|                          | HA1 | 10 | 20 | 30 | 40 | 50 | 60 | 70 | 80 | 90 | 100 |
|--------------------------|-----|----|----|----|----|----|----|----|----|----|-----|
| B/Florida/4/2006         | DR  | I  | C  | T  | G  | I  | T  | S  | S  | N  | S   |
| B/Wisconsin/1/2010       | DR  | I  | C  | T  | G  | I  | T  | S  | S  | N  | S   |
| B/Bangladesh/3333/2007   | DR  | I  | C  | T  | G  | I  | T  | S  | S  | N  | S   |
| B/Stockholm/12/2011      | DR  | I  | C  | T  | G  | I  | T  | S  | S  | N  | S   |
| B/Thailand/CU-H2933/2011 | DR  | I  | C  | T  | G  | I  | T  | S  | S  | N  | S   |
| B/Thailand/CU-B3313/2012 | DR  | I  | C  | T  | G  | I  | T  | S  | S  | N  | S   |
| B/Thailand/CU-H3496/2012 | DR  | I  | C  | T  | G  | I  | T  | S  | S  | N  | S   |
| B/Thailand/CU-B6096/2012 | DR  | I  | C  | T  | G  | I  | T  | S  | S  | N  | S   |
| B/Massachusetts/2/2012   | DR  | I  | C  | T  | G  | I  | T  | S  | S  | N  | S   |
| B/Estonia/55669/2011     | DR  | I  | C  | T  | G  | I  | T  | S  | S  | N  | S   |
| B/Thailand/CU-H3349/2012 | DR  | I  | C  | T  | G  | I  | T  | S  | S  | N  | S   |
| B/Thailand/CU-H3456/2012 | DR  | I  | C  | T  | G  | I  | T  | S  | S  | N  | S   |
| B/Thailand/CU-B6078/2011 | DR  | I  | C  | T  | G  | I  | T  | S  | S  | N  | S   |
| B/Thailand/CU-A585/2013  | DR  | I  | C  | T  | G  | I  | T  | S  | S  | N  | S   |
| B/Thailand/CU-B8813/2013 | DR  | I  | C  | T  | G  | I  | T  | S  | S  | N  | S   |
| B/Thailand/CU-B8332/2013 | DR  | I  | C  | T  | G  | I  | T  | S  | S  | N  | S   |
| B/Thailand/CU-A605/2014  | DR  | I  | C  | T  | G  | I  | T  | S  | S  | N  | S   |
| B/Thailand/CU-A615/2014  | DR  | I  | C  | T  | G  | I  | T  | S  | S  | N  | S   |
| B/Thailand/CU-A626/2014  | DR  | I  | C  | T  | G  | I  | T  | S  | S  | N  | S   |
| B/Thailand/CU-A645/2014  | DR  | I  | C  | T  | G  | I  | T  | S  | S  | N  | S   |
| B/Thailand/CU-B8925/2014 | DR  | I  | C  | T  | G  | I  | T  | S  | S  | N  | S   |
| B/Thailand/CU-B8999/2014 | DR  | I  | C  | T  | G  | I  | T  | S  | S  | N  | S   |
| B/Thailand/CU-B9017/2014 | DR  | I  | C  | T  | G  | I  | T  | S  | S  | N  | S   |
| B/Thailand/CU-B9034/2014 | DR  | I  | C  | T  | G  | I  | T  | S  | S  | N  | S   |
| B/Thailand/CU-C4555/2014 | DR  | I  | C  | T  | G  | I  | T  | S  | S  | N  | S   |
| B/Thailand/CU-H3591/2014 | DR  | I  | C  | T  | G  | I  | T  | S  | S  | N  | S   |

|                          | 110 | 120 | 130 | 140 | 150 | 160 | 170 | 180 | 190 | 200 |   |
|--------------------------|-----|-----|-----|-----|-----|-----|-----|-----|-----|-----|---|
| B/Florida/4/2006         | R   | T   | K   | I   | R   | L   | P   | N   | L   | R   | G |
| B/Wisconsin/1/2010       | R   | T   | K   | I   | R   | L   | P   | N   | L   | R   | G |
| B/Bangladesh/3333/2007   | R   | T   | K   | I   | R   | L   | P   | N   | L   | R   | G |
| B/Stockholm/12/2011      | R   | T   | K   | I   | R   | L   | P   | N   | L   | R   | G |
| B/Thailand/CU-H2933/2011 | R   | T   | K   | I   | R   | L   | P   | N   | L   | R   | G |
| B/Thailand/CU-B3313/2012 | R   | T   | K   | I   | R   | L   | P   | N   | L   | R   | G |
| B/Thailand/CU-H3496/2012 | R   | T   | K   | I   | R   | L   | P   | N   | L   | R   | G |
| B/Thailand/CU-B6096/2012 | R   | T   | K   | I   | R   | L   | P   | N   | L   | R   | G |
| B/Massachusetts/2/2012   | R   | T   | K   | I   | R   | L   | P   | N   | L   | R   | G |
| B/Estonia/55669/2011     | R   | T   | K   | I   | R   | L   | P   | N   | L   | R   | G |
| B/Thailand/CU-H3349/2012 | R   | T   | K   | I   | R   | L   | P   | N   | L   | R   | G |
| B/Thailand/CU-H3456/2012 | R   | T   | K   | I   | R   | L   | P   | N   | L   | R   | G |
| B/Thailand/CU-B6078/2011 | R   | T   | K   | I   | R   | L   | P   | N   | L   | R   | G |
| B/Thailand/CU-A585/2013  | R   | T   | K   | I   | R   | L   | P   | N   | L   | R   | G |
| B/Thailand/CU-B8813/2013 | R   | T   | K   | I   | R   | L   | P   | N   | L   | R   | G |
| B/Thailand/CU-B8332/2013 | R   | T   | K   | I   | R   | L   | P   | N   | L   | R   | G |
| B/Thailand/CU-A605/2014  | R   | T   | K   | I   | R   | L   | P   | N   | L   | R   | G |
| B/Thailand/CU-A615/2014  | R   | T   | K   | I   | R   | L   | P   | N   | L   | R   | G |
| B/Thailand/CU-A626/2014  | R   | T   | K   | I   | R   | L   | P   | N   | L   | R   | G |
| B/Thailand/CU-A645/2014  | R   | T   | K   | I   | R   | L   | P   | N   | L   | R   | G |
| B/Thailand/CU-B8925/2014 | R   | T   | K   | I   | R   | L   | P   | N   | L   | R   | G |
| B/Thailand/CU-B8999/2014 | R   | T   | K   | I   | R   | L   | P   | N   | L   | R   | G |
| B/Thailand/CU-B9017/2014 | R   | T   | K   | I   | R   | L   | P   | N   | L   | R   | G |
| B/Thailand/CU-B9034/2014 | R   | T   | K   | I   | R   | L   | P   | N   | L   | R   | G |
| B/Thailand/CU-C4555/2014 | R   | T   | K   | I   | R   | L   | P   | N   | L   | R   | G |
| B/Thailand/CU-H3591/2014 | R   | T   | K   | I   | R   | L   | P   | N   | L   | R   | G |

|                          | 210 | 220 | 230 | 240 | 250 | 260 | 270 | 280 | 290 | 300 |
|--------------------------|-----|-----|-----|-----|-----|-----|-----|-----|-----|-----|
| B/Florida/4/2006         | K   | N   | L   | I   | G   | D   | S   | N   | P   | Q   |
| B/Wisconsin/1/2010       | K   | N   | L   | I   | G   | D   | S   | N   | P   | Q   |
| B/Bangladesh/3333/2007   | K   | N   | L   | I   | G   | D   | S   | N   | P   | Q   |
| B/Stockholm/12/2011      | K   | N   | L   | I   | G   | D   | S   | N   | P   | Q   |
| B/Thailand/CU-H2933/2011 | K   | N   | L   | I   | G   | D   | S   | N   | P   | Q   |
| B/Thailand/CU-B3313/2012 | K   | N   | L   | I   | G   | D   | S   | N   | P   | Q   |
| B/Thailand/CU-H3496/2012 | K   | N   | L   | I   | G   | D   | S   | N   | P   | Q   |
| B/Thailand/CU-B6096/2012 | K   | N   | L   | I   | G   | D   | S   | N   | P   | Q   |
| B/Massachusetts/2/2012   | K   | N   | L   | I   | G   | D   | S   | N   | P   | Q   |
| B/Estonia/55669/2011     | K   | N   | L   | I   | G   | D   | S   | N   | P   | Q   |
| B/Thailand/CU-H3349/2012 | K   | N   | L   | I   | G   | D   | S   | N   | P   | Q   |
| B/Thailand/CU-H3456/2012 | K   | N   | L   | I   | G   | D   | S   | N   | P   | Q   |
| B/Thailand/CU-B6078/2011 | K   | N   | L   | I   | G   | D   | S   | N   | P   | Q   |
| B/Thailand/CU-A585/2013  | K   | N   | L   | I   | G   | D   | S   | N   | P   | Q   |
| B/Thailand/CU-B8813/2013 | K   | N   | L   | I   | G   | D   | S   | N   | P   | Q   |
| B/Thailand/CU-B8332/2013 | K   | N   | L   | I   | G   | D   | S   | N   | P   | Q   |
| B/Thailand/CU-A605/2014  | K   | N   | L   | I   | G   | D   | S   | N   | P   | Q   |
| B/Thailand/CU-A615/2014  | K   | N   | L   | I   | G   | D   | S   | N   | P   | Q   |
| B/Thailand/CU-A626/2014  | K   | N   | L   | I   | G   | D   | S   | N   | P   | Q   |
| B/Thailand/CU-A645/2014  | K   | N   | L   | I   | G   | D   | S   | N   | P   | Q   |
| B/Thailand/CU-B8925/2014 | K   | N   | L   | I   | G   | D   | S   | N   | P   | Q   |
| B/Thailand/CU-B8999/2014 | K   | N   | L   | I   | G   | D   | S   | N   | P   | Q   |
| B/Thailand/CU-B9017/2014 | K   | N   | L   | I   | G   | D   | S   | N   | P   | Q   |
| B/Thailand/CU-B9034/2014 | K   | N   | L   | I   | G   | D   | S   | N   | P   | Q   |
| B/Thailand/CU-C4555/2014 | K   | N   | L   | I   | G   | D   | S   | N   | P   | Q   |
| B/Thailand/CU-H3591/2014 | K   | N   | L   | I   | G   | D   | S   | N   | P   | Q   |

```

.....310.....320.....330.....340.....HA2.....360.....370.....380.....390.....400
GLNKSPPYYTGEHAKAIGNCPIWVKTPCLKLANGTKYRPPAKLLKERGFFFGAIAAGFLEGGWEGMIAQWHGYTSHGAHGVAADLKSTQEAINKITKNLNS
.....K.....
.....K.....
.....E.....

```

[illegible][illegible]

Reference strains, Vaccine strains, Thailand strains; Potential N-linked glycosylation sites; Catalytic site and framework residues

B/Florida/4/2006  
B/Perth/211/2001  
B/Thailand/CU-B6078/2012  
B/Thailand/CU-H3349/2012  
B/Thailand/CU-H3456/2012  
B/Thailand/CU-A585/2013  
B/Thailand/CU-B8813/2013  
B/Thailand/CU-H8332/2013  
B/Thailand/CU-A605/2014  
B/Thailand/CU-A615/2014  
B/Thailand/CU-A626/2014  
B/Thailand/CU-A645/2014  
B/Thailand/CU-B8925/2014  
B/Thailand/CU-B8999/2014  
B/Thailand/CU-B9017/2014  
B/Thailand/CU-B9034/2014  
B/Thailand/CU-C4555/2014  
B/Thailand/CU-H3591/2014  
B/Wisconsin/1/2010  
B/Thailand/CU-H2933/2011  
B/Thailand/CU-B6096/2012  
B/Thailand/CU-H3316/2012  
B/Thailand/CU-H3349/2012  
B/Malaysia/2506/2004  
B/Thailand/CU-243/2006  
B/Thailand/CU-364/2008  
B/Brisbane/60/2008  
B/Thailand/CU-B2271/2010  
B/Thailand/CU-B2660/2010  
B/Thailand/CU-B3153/2010  
B/Thailand/CU-C1262/2010  
B/Thailand/CU-C1451/2010  
B/Thailand/CU-B2504/2010  
B/Thailand/CU-B4505/2011  
B/Thailand/CU-B5522/2011  
B/Thailand/CU-B5734/2011  
B/Thailand/CU-C1768/2011  
B/Thailand/CU-H3002/2011  
B/Thailand/CU-H3052/2011  
B/Thailand/CU-B6148/2012  
B/Thailand/CU-B7215/2012  
B/Thailand/CU-B6257/2012  
B/Thailand/CU-B6975/2012  
B/Thailand/CU-B7337/2012  
B/Thailand/CU-B2201/2010  
B/Thailand/CU-B2320/2010  
B/Thailand/CU-B2372/2010  
B/Thailand/CU-B2390/2010  
B/Thailand/CU-B2432/2010  
B/Thailand/CU-H1400/2010  
B/Thailand/CU-H1896/2010  
B/Thailand/CU-H2132/2010  
B/Thailand/CU-H2584/2010  
B/Thailand/CU-H2738/2010  
B/Thailand/CU-B4585/2011  
B/Thailand/CU-B5671/2011  
B/Thailand/CU-B5910/2011  
B/Thailand/CU-B6240/2011



|                          | 210          | 220      | 230        | 240      | 250       | 260      | 270       | 280       | 290        | 300       |        |
|--------------------------|--------------|----------|------------|----------|-----------|----------|-----------|-----------|------------|-----------|--------|
| B/Florida/4/2006         | LLKIKYGEAYTD | TYHSYAKN | ILRTQESACN | CIGGDCYL | MITDGPASG | ISECRFLK | IREGRIIKE | IFPTGRVKH | TEECTCGFAS | NKTEACRDN | SYTAKR |
| B/Perth/211/2001         | .....        | N.....   | .....      | N.....   | S.....    | .....    | .....     | .....     | .....      | .....     | .....  |
| B/Thailand/CU-B6078/2012 | .....        | .....    | .....      | .....    | V.....    | .....    | .....     | .....     | .....      | R.....    | .....  |
| B/Thailand/CU-H3349/2012 | .....        | .....    | .....      | .....    | V.....    | .....    | .....     | .....     | .....      | R.....    | .....  |
| B/Thailand/CU-H3456/2012 | .....        | .....    | .....      | .....    | V.....    | .....    | .....     | .....     | .....      | R.....    | .....  |
| B/Thailand/CU-A585/2013  | .....        | .....    | .....      | .....    | V.....    | .....    | .....     | .....     | .....      | H.....    | .....  |
| B/Thailand/CU-B8813/2013 | .....        | .....    | .....      | .....    | V.....    | .....    | .....     | .....     | .....      | R.....    | .....  |
| B/Thailand/CU-H8332/2013 | .....        | .....    | .....      | .....    | V.....    | .....    | .....     | .....     | .....      | R.....    | .....  |
| B/Thailand/CU-A605/2014  | .....        | .....    | R.....     | .....    | V.....    | .....    | .....     | .....     | .....      | R.....    | .....  |
| B/Thailand/CU-A615/2014  | .....        | .....    | .....      | .....    | V.....    | .....    | .....     | .....     | .....      | R.....    | .....  |
| B/Thailand/CU-A626/2014  | .....        | .....    | .....      | .....    | V.....    | .....    | .....     | .....     | .....      | R.....    | .....  |
| B/Thailand/CU-A645/2014  | .....        | .....    | .....      | .....    | V.....    | .....    | .....     | .....     | .....      | R.....    | .....  |
| B/Thailand/CU-B8925/2014 | .....        | .....    | .....      | .....    | V.....    | .....    | .....     | .....     | .....      | R.....    | .....  |
| B/Thailand/CU-B8999/2014 | .....        | .....    | .....      | .....    | V.....    | .....    | .....     | .....     | .....      | R.....    | .....  |
| B/Thailand/CU-B9017/2014 | .....        | .....    | .....      | .....    | V.....    | .....    | .....     | .....     | .....      | R.....    | .....  |
| B/Thailand/CU-B9034/2014 | .....        | .....    | .....      | .....    | V.....    | .....    | .....     | .....     | .....      | H.....    | .....  |
| B/Thailand/CU-C4555/2014 | .....        | .....    | .....      | .....    | V.....    | .....    | .....     | .....     | .....      | R.....    | .....  |
| B/Thailand/CU-H3591/2014 | .....        | .....    | .....      | .....    | V.....    | .....    | .....     | .....     | .....      | R.....    | .....  |
| B/Wisconsin/1/2010       | .....        | .....    | .....      | .....    | .....     | .....    | .....     | .....     | .....      | .....     | .....  |
| B/Thailand/CU-H2933/2011 | .....        | .....    | .....      | .....    | .....     | .....    | .....     | .....     | .....      | .....     | .....  |
| B/Thailand/CU-B6096/2012 | .....        | .....    | .....      | .....    | .....     | .....    | .....     | .....     | .....      | .....     | .....  |
| B/Thailand/CU-H3313/2012 | .....        | .....    | .....      | .....    | .....     | .....    | .....     | .....     | .....      | .....     | .....  |
| B/Thailand/CU-H3496/2012 | .....        | .....    | .....      | .....    | .....     | .....    | .....     | .....     | .....      | .....     | .....  |
| B/Malaysia/2506/2004     | .....        | N.....   | .....      | N.....   | S.....    | V.....   | .....     | I.....    | .....      | .....     | .....  |
| B/Thailand/CU-243/2006   | .....        | NK.....  | .....      | N.....   | S.....    | V.....   | .....     | .....     | E.....     | .....     | .....  |
| B/Thailand/CU-364/2008   | .....        | NK.....  | .....      | N.....   | S.....    | V.....   | .....     | .....     | E.....     | .....     | .....  |
| B/Brisbane/60/2008       | .....        | V.....   | NK.....    | .....    | N.....    | S.....   | V.....    | .....     | .....      | .....     | .....  |
| B/Thailand/CU-B2271/2010 | .....        | V.....   | NK.....    | .....    | N.....    | S.....   | V.....    | .....     | .....      | .....     | .....  |
| B/Thailand/CU-B2660/2010 | .....        | V.....   | NK.....    | .....    | N.....    | S.....   | V.....    | .....     | .....      | .....     | .....  |
| B/Thailand/CU-B3153/2010 | .....        | V.....   | NK.....    | .....    | N.....    | S.....   | V.....    | .....     | .....      | .....     | .....  |
| B/Thailand/CU-C1262/2010 | .....        | V.....   | NK.....    | .....    | N.....    | S.....   | V.....    | .....     | .....      | .....     | .....  |
| B/Thailand/CU-C1451/2010 | .....        | V.....   | NK.....    | .....    | N.....    | S.....   | V.....    | .....     | .....      | .....     | .....  |
| B/Thailand/CU-B2504/2010 | .....        | V.....   | NK.....    | .....    | N.....    | S.....   | V.....    | .....     | .....      | .....     | .....  |
| B/Thailand/CU-B4505/2011 | .....        | V.....   | NK.....    | .....    | N.....    | S.....   | V.....    | .....     | .....      | .....     | .....  |
| B/Thailand/CU-B5522/2011 | .....        | V.....   | NK.....    | .....    | N.....    | S.....   | V.....    | .....     | .....      | .....     | .....  |
| B/Thailand/CU-B5734/2011 | .....        | V.....   | NK.....    | .....    | N.....    | S.....   | V.....    | .....     | .....      | .....     | .....  |
| B/Thailand/CU-C1768/2011 | .....        | V.....   | NK.....    | .....    | N.....    | S.....   | V.....    | .....     | .....      | .....     | .....  |
| B/Thailand/CU-H3002/2011 | .....        | V.....   | NK.....    | .....    | N.....    | S.....   | V.....    | .....     | .....      | .....     | .....  |
| B/Thailand/CU-H3052/2011 | .....        | V.....   | NK.....    | .....    | N.....    | S.....   | V.....    | .....     | .....      | .....     | .....  |
| B/Thailand/CU-B6148/2012 | .....        | V.....   | NK.....    | .....    | N.....    | S.....   | V.....    | .....     | .....      | .....     | .....  |
| B/Thailand/CU-B7215/2012 | .....        | V.....   | NK.....    | .....    | N.....    | S.....   | V.....    | .....     | .....      | .....     | .....  |
| B/Thailand/CU-B6257/2012 | .....        | V.....   | NK.....    | .....    | N.....    | S.....   | V.....    | .....     | .....      | R.....    | .....  |
| B/Thailand/CU-B6975/2012 | .....        | V.....   | NK.....    | .....    | N.....    | S.....   | V.....    | .....     | .....      | R.....    | .....  |
| B/Thailand/CU-B7337/2012 | .....        | V.....   | NK.....    | .....    | N.....    | S.....   | V.....    | .....     | .....      | R.....    | .....  |
| B/Thailand/CU-B2201/2010 | .....        | V.....   | NK.....    | .....    | N.....    | S.....   | V.....    | .....     | .....      | .....     | .....  |
| B/Thailand/CU-B2320/2010 | .....        | V.....   | NK.....    | .....    | N.....    | S.....   | V.....    | .....     | .....      | .....     | .....  |
| B/Thailand/CU-B2372/2010 | .....        | V.....   | NK.....    | .....    | N.....    | S.....   | V.....    | .....     | .....      | .....     | .....  |
| B/Thailand/CU-B2390/2010 | .....        | V.....   | N.....     | .....    | N.....    | S.....   | V.....    | .....     | .....      | .....     | .....  |
| B/Thailand/CU-B2432/2010 | .....        | V.....   | NK.....    | .....    | N.....    | S.....   | V.....    | .....     | .....      | .....     | .....  |
| B/Thailand/CU-H1400/2010 | .....        | V.....   | NK.....    | .....    | N.....    | S.....   | V.....    | .....     | .....      | .....     | .....  |
| B/Thailand/CU-H1896/2010 | .....        | V.....   | NK.....    | .....    | N.....    | S.....   | V.....    | .....     | .....      | .....     | .....  |
| B/Thailand/CU-H2132/2010 | .....        | V.....   | NK.....    | .....    | N.....    | S.....   | V.....    | .....     | .....      | .....     | .....  |
| B/Thailand/CU-H2584/2010 | .....        | V.....   | NK.....    | .....    | N.....    | S.....   | V.....    | .....     | .....      | .....     | .....  |
| B/Thailand/CU-H2738/2010 | .....        | V.....   | NK.....    | .....    | N.....    | S.....   | V.....    | .....     | .....      | .....     | .....  |
| B/Thailand/CU-B4585/2011 | .....        | F.....   | N.....     | .....    | N.....    | S.....   | V.....    | .....     | .....      | .....     | .....  |
| B/Thailand/CU-B5671/2011 | .....        | V.....   | NK.....    | E.....   | N.....    | S.....   | V.....    | V.....    | .....      | .....     | .....  |
| B/Thailand/CU-B5910/2011 | .....        | V.....   | NE.....    | .....    | N.....    | S.....   | V.....    | .....     | .....      | .....     | .....  |
| B/Thailand/CU-B6240/2012 | .....        | NK.....  | .....      | .....    | N.....    | S.....   | V.....    | .....     | .....      | R.....    | .....  |
